# Supplementary material for: Hydrochemical evaluation of water resources and human impacts on an urban karst system, Jordan
Source: Springer Nature journal article supplement (doi:10.1007/s10040-020-02174-2), 2020-06-05
Supplement: MOESM1 [file 18056034]

# Hydrogeology Journal - Electronic Supplementary Material

## Hydrochemical evaluation of water resources and human impacts on an urban karst system, Jordan

Julian Xanke<sup>1\*</sup>, Anna Ender<sup>2</sup>, Felix Grimmeisen<sup>3</sup>, Nadine Goepfert<sup>1</sup>, Nico Goldscheider<sup>1</sup>

<sup>1</sup>Karlsruhe Institute of Technology (KIT), Institute of Applied Geosciences (AGW), Division of Hydrogeology, Kaiserstr. 12, 76131 Karlsruhe, Germany

<sup>2</sup>Karlsruhe Institute of Technology (KIT), Project Management Agency Karlsruhe (PTKA), Hermann-von-Helmholtz-Platz 1, 76344 Eggenstein-Leopoldshafen, Germany

<sup>3</sup> SEBA Hydrometrie GmbH & Co. KG, Gewerbestraße 61 A, D-87600 Kaufbeuren

\*Corresponding Author: Phone: +49 721 608 41968; Fax: +49 721 608 4 7603; E-Mail: julian.xanke@kit.edu

Table S1 Physico-chemical parameters of Wadi Shueib springs and wells from 1962 to 2018 (n.a. = not available) .

| Sample ID | Date       | TDS    | T°C  | pH  | EC      | Ca <sup>2+</sup> | Mg <sup>+</sup> | Na <sup>+</sup> | K <sup>+</sup> | HCO <sub>3</sub> <sup>-</sup> | Cl <sup>-</sup> | SO <sub>4</sub> <sup>2-</sup> | NO <sub>3</sub> <sup>-</sup> | Br <sup>-</sup> |  |
|-----------|------------|--------|------|-----|---------|------------------|-----------------|-----------------|----------------|-------------------------------|-----------------|-------------------------------|------------------------------|-----------------|--|
|           |            | (mg/L) | (°C) | (-) | (µS/cm) | (mg/L)           |                 |                 |                |                               |                 |                               |                              |                 |  |
| Azraq     | 29.09.1962 | 359    | n.a. | 7.9 | 490     | 68.1             | 13.4            | 9.2             | n.a.           | 213.5                         | 28.4            | 26.4                          | n.a.                         | n.a.            |  |
| Azraq     | 02.06.1963 | 348    | n.a. | 8.2 | 490     | 68.1             | 12.2            | 11.5            | n.a.           | 195.2                         | 32.0            | 28.8                          | n.a.                         | n.a.            |  |
| Azraq     | 09.06.1963 | 406    | n.a. | 7.3 | 520     | 74.1             | 15.8            | 11.5            | n.a.           | 244.0                         | 32.0            | 28.8                          | n.a.                         | n.a.            |  |
| Azraq     | 23.05.1988 | 355    | n.a. | 7.6 | 450     | 58.5             | 15.1            | 11.5            | n.a.           | 220.8                         | 22.0            | 3.8                           | 23.4                         | n.a.            |  |
| Azraq     | 24.05.1988 | 587    | n.a. | 7.3 | 760     | 81.4             | 24.8            | 32.2            | 12.1           | 274.5                         | 56.4            | 29.8                          | 76.0                         | n.a.            |  |
| Azraq     | 10.08.1988 | 373    | n.a. | 7.7 | 470     | 62.7             | 14.7            | 11.5            | 1.2            | 215.9                         | 24.9            | 20.2                          | 22.2                         | n.a.            |  |
| Azraq     | 30.06.1989 | 369    | n.a. | 7.6 | 460     | 63.1             | 16.5            | 9.2             | 2.0            | 231.8                         | 23.1            | n.a.                          | 22.8                         | n.a.            |  |
| Azraq     | 21.06.1990 | 385    | n.a. | 7.8 | 490     | 60.1             | 12.2            | 9.2             | n.a.           | 244.0                         | 35.5            | n.a.                          | 23.7                         | n.a.            |  |
| Azraq     | 20.03.1991 | 372    | n.a. | 7.7 | 480     | 67.7             | 10.9            | 18.4            | 0.4            | 223.3                         | 22.0            | 4.8                           | 24.2                         | n.a.            |  |
| Azraq     | 27.05.1991 | 387    | n.a. | 7.6 | 480     | 67.7             | 12.2            | 18.4            | n.a.           | 228.2                         | 24.8            | 12.5                          | 23.2                         | n.a.            |  |
| Azraq     | 20.08.1995 | 359    | n.a. | 7.6 | 488     | 63.3             | 13.4            | 10.8            | 0.4            | 220.2                         | 23.8            | 1.9                           | 25.5                         | n.a.            |  |
| Azraq     | 08.11.1995 | 371    | n.a. | 7.7 | 487     | 64.7             | 13.3            | 10.6            | 0.4            | 223.3                         | 27.3            | 8.6                           | 22.6                         | n.a.            |  |
| Azraq     | 05.02.1996 | 371    | n.a. | 7.7 | 483     | 64.7             | 15.7            | 10.8            | 0.4            | 225.7                         | 25.9            | 7.2                           | 20.8                         | n.a.            |  |
| Azraq     | 26.04.1998 | 369    | n.a. | 7.6 | 483     | 67.9             | 14.1            | 10.6            | 1.2            | 222.7                         | 26.3            | 0.0                           | 26.8                         | n.a.            |  |
| Azraq     | 23.05.1999 | 380    | n.a. | 7.8 | 504     | 61.6             | 18.4            | 13.3            | 0.8            | 220.8                         | 28.4            | 14.4                          | 22.5                         | n.a.            |  |
| Azraq     | 04.09.2003 | 397    | n.a. | 7.9 | 517     | 67.0             | 16.0            | 14.0            | 0.0            | 240.0                         | 27.0            | 11.0                          | 22.0                         | n.a.            |  |
| Azraq     | 15.04.2004 | 443    | n.a. | 7.4 | 520     | 83.4             | 14.7            | 13.8            | 0.8            | 246.4                         | 41.2            | 15.8                          | 27.3                         | n.a.            |  |
| Azraq     | 08.06.2005 | 411    | n.a. | 7.9 | 525     | 64.7             | 18.5            | 14.7            | 0.8            | 245.2                         | 32.7            | 11.5                          | 23.2                         | n.a.            |  |
| Azraq     | 23.02.2012 | 423    | 20.1 | 7.5 | 808     | 75.6             | 12.3            | 27.4            | 1.4            | 220.2                         | 39.9            | 19.2                          | 27.0                         | n.a.            |  |
| Baqqouria | 24.05.1988 | 411    | n.a. | 7.4 | 540     | 62.9             | 19.2            | 16.1            | 2.0            | 231.2                         | 34.4            | 13.4                          | 32.0                         | 0.2             |  |
| Baqqouria | 15.02.1989 | 407    | n.a. | 7.9 | 580     | 64.7             | 16.8            | 16.1            | 2.7            | 214.7                         | 31.6            | 27.4                          | 32.6                         | 0.2             |  |
| Baqqouria | 04.09.1989 | 450    | n.a. | 7.5 | 590     | 68.7             | 21.9            | 18.4            | 3.5            | 238.5                         | 38.7            | 25.9                          | 33.7                         | 0.2             |  |
| Baqqouria | 09.12.1989 | 439    | n.a. | 7.6 | 540     | 70.5             | 19.2            | 18.4            | 4.7            | 240.3                         | 36.6            | 15.4                          | 33.8                         | 0.2             |  |
| Baqqouria | 03.03.1990 | 426    | n.a. | 7.9 | 590     | 71.5             | 15.8            | 18.4            | 5.1            | 217.8                         | 40.8            | 26.9                          | 29.8                         | 0.2             |  |
| Baqqouria | 21.03.1991 | 446    | n.a. | 7.8 | 590     | 75.4             | 14.6            | 30.9            | 2.3            | 234.3                         | 34.4            | 17.3                          | 36.1                         | 0.3             |  |
| Baqqouria | 27.05.1991 | 474    | n.a. | 7.7 | 588     | 73.3             | 18.2            | 34.0            | 2.7            | 239.2                         | 38.3            | 27.9                          | 39.6                         | 0.3             |  |

|             |            |     |      |      |      |       |      |      |      |       |       |      |       |      |
|-------------|------------|-----|------|------|------|-------|------|------|------|-------|-------|------|-------|------|
| Baqqouria   | 19.06.1994 | 446 | n.a. | 7.4  | 607  | 72.5  | 18.2 | 16.6 | 2.7  | 245.2 | 39.4  | 16.3 | 34.5  | 0.2  |
| Baqqouria   | 20.08.1995 | 456 | n.a. | 8.0  | 602  | 68.9  | 18.5 | 17.7 | 2.7  | 243.4 | 37.6  | 29.8 | 37.2  | 0.2  |
| Baqqouria   | 23.10.1995 | 454 | n.a. | 7.9  | 653  | 71.9  | 18.6 | 18.9 | 3.1  | 248.9 | 39.8  | 19.2 | 33.7  | 0.2  |
| Baqqouria   | 23.05.1999 | 498 | n.a. | 7.6  | 683  | 75.5  | 22.7 | 22.1 | 4.7  | 265.4 | 45.1  | 25.4 | 37.2  | 0.2  |
| Baqqouria   | 31.05.2000 | 509 | n.a. | 7.4  | 645  | 74.7  | 25.3 | 22.5 | 5.1  | 259.9 | 49.0  | 29.8 | 42.4  | 0.2  |
| Baqqouria   | 04.06.2000 | 500 | n.a. | 7.8  | 608  | 81.2  | 18.9 | 21.9 | 4.7  | 261.1 | 44.7  | 28.3 | 38.7  | 0.2  |
| Baqqouria   | 04.09.2003 | 440 | n.a. | 7.9  | 670  | 71.0  | 20.0 | 18.0 | 3.0  | 239.0 | 38.0  | 20.0 | 30.3  | 0.2  |
| Baqqouria   | 18.05.2004 | 504 | n.a. | 7.8  | 637  | 40.1  | 56.3 | 20.7 | 3.5  | 241.6 | 44.0  | 33.1 | 64.3  | 0.3  |
| Baqqouria   | 08.06.2005 | 453 | 19.6 | 7.4  | 715  | 86.4  | 9.5  | 23.2 | 3.5  | 234.2 | 43.3  | 21.1 | 31.5  | 0.2  |
| Baqqouria   | 15.02.2012 | 530 | 19.2 | 7.2  | 1004 | 86.2  | 19.7 | 31.3 | 4.2  | 242.0 | 64.6  | 38.9 | 43.3  | n.a. |
| Baqqouria   | 29.11.2017 | 596 | 21   | 7.3  | 784  | 85.7  | 27.3 | 41.9 | 5.4  | 268.5 | 87.7  | 46.0 | 32.6  | 0.7  |
| Baqqouria   | 29.04.2018 | 584 | n.a. | 7.6  | 530  | 76.8  | 22.9 | 42.0 | 5.4  | 274.6 | 80.3  | 47.6 | 34.0  | 0.4  |
| Farkha      | 10.05.1995 | 595 | n.a. | 7.8  | 718  | 90.4  | 24.0 | 36.3 | 12.9 | 277.6 | 62.5  | 23.0 | 68.4  | 0.3  |
| Farkha      | 28.07.1997 | 546 | n.a. | 7.8  | 693  | 87.9  | 21.2 | 29.2 | 5.9  | 250.1 | 56.8  | 25.9 | 69.1  | 0.2  |
| Farkha      | 30.08.2000 | 478 | n.a. | 7.7  | 860  | 85.7  | 23.2 | 24.4 | 3.9  | 248.9 | 52.9  | 22.6 | 16.2  | 0.2  |
| Farkha      | 18.05.2004 | 416 | 15.4 | 7.8  | 1523 | 50.1  | 15.7 | 34.7 | 6.7  | 150.1 | 42.3  | 34.1 | 81.7  | 0.4  |
| Farkha      | 19.02.2012 | 619 | n.a. | n.a. | n.a. | 85.8  | 24.5 | 45.8 | 7.5  | 265.4 | 91.6  | 41.4 | 57.1  | n.a. |
| Farkha      | 29.11.2017 | 727 | 19.3 | 7.3  | 1002 | 92.2  | 26.9 | 66.1 | 10.5 | 299.0 | 117.7 | 62.9 | 50.8  | 1.0  |
| Farkha      | 29.04.2018 | 792 | 17.5 | 7.3  | 895  | 104.5 | 27.8 | 66.0 | 7.7  | 283.7 | 120.6 | 66.3 | 115.0 | 0.5  |
| Hazzir      | 15.02.1989 | 586 | n.a. | 7.2  | 800  | 84.0  | 21.3 | 34.5 | 13.7 | 263.5 | 56.1  | 36.0 | 77.0  | n.a. |
| Hazzir      | 04.09.1989 | 632 | n.a. | 7.7  | 812  | 89.6  | 28.2 | 32.2 | 15.6 | 289.8 | 61.1  | 40.3 | 74.8  | n.a. |
| Hazzir      | 09.12.1989 | 631 | n.a. | 7.3  | 820  | 88.2  | 25.3 | 34.5 | 17.2 | 303.2 | 60.0  | 26.9 | 75.7  | n.a. |
| Hazzir      | 03.03.1990 | 590 | n.a. | 7.3  | 770  | 88.4  | 23.5 | 29.9 | 13.3 | 264.7 | 56.8  | 42.2 | 71.1  | n.a. |
| Hazzir      | 21.03.1991 | 629 | n.a. | 7.4  | 820  | 89.8  | 23.1 | 56.3 | 11.7 | 280.0 | 58.8  | 31.7 | 77.7  | n.a. |
| Hazzir      | 27.05.1991 | 606 | n.a. | 7.4  | 760  | 85.4  | 21.9 | 53.2 | 10.2 | 276.4 | 53.5  | 31.7 | 73.5  | n.a. |
| Hazzir      | 19.06.1994 | 562 | n.a. | 7.5  | 772  | 86.6  | 21.9 | 29.7 | 10.6 | 271.5 | 54.3  | 21.6 | 66.0  | n.a. |
| Hazzir      | 20.08.1995 | 585 | n.a. | 7.2  | 824  | 87.0  | 22.6 | 31.3 | 11.3 | 289.8 | 54.3  | 17.3 | 71.5  | n.a. |
| Hazzir      | 23.10.1995 | 602 | n.a. | 7.9  | 811  | 90.8  | 22.1 | 32.7 | 11.3 | 292.2 | 61.1  | 20.6 | 71.3  | n.a. |
| Hazzir      | 05.02.1996 | 591 | n.a. | 7.1  | 801  | 90.0  | 23.2 | 32.9 | 10.9 | 275.1 | 58.9  | 31.7 | 68.0  | n.a. |
| Hazzir      | 23.05.1999 | 650 | n.a. | 7.2  | 870  | 93.6  | 30.0 | 36.6 | 11.7 | 312.9 | 65.3  | 37.9 | 62.0  | n.a. |
| Hazzir      | 31.05.2000 | 650 | n.a. | 7.7  | 876  | 96.1  | 27.2 | 35.9 | 11.7 | 311.1 | 64.6  | 35.5 | 68.2  | n.a. |
| Hazzir      | 04.06.2000 | 641 | n.a. | 7.6  | 813  | 101.8 | 24.6 | 33.6 | 11.0 | 309.9 | 61.8  | 37.0 | 61.2  | n.a. |
| Hazzir      | 04.09.2003 | 602 | n.a. | 7.7  | 831  | 90.0  | 26.0 | 32.0 | 10.0 | 295.0 | 58.0  | 27.0 | 63.9  | n.a. |
| Hazzir      | 18.05.2004 | 597 | n.a. | 7.9  | 861  | 101.2 | 19.7 | 33.1 | 7.8  | 301.3 | 63.9  | 33.1 | 36.6  | n.a. |
| Hazzir      | 08.06.2005 | 626 | n.a. | 7.6  | 845  | 90.4  | 28.6 | 36.3 | 11.3 | 289.8 | 67.8  | 31.7 | 70.2  | n.a. |
| Hazzir      | 15.02.2012 | 642 | 13.3 | 8.6  | 1013 | 94.6  | 23.5 | 48.7 | 10.9 | 270.2 | 90.9  | 53.1 | 50.6  | n.a. |
| Hazzir      | 30.11.2017 | 750 | 19.1 | 7.2  | 1014 | 81.6  | 27.0 | 80.2 | 13.1 | 305.1 | 133.8 | 72.7 | 35.7  | 1.3  |
| Hazzir      | 29.04.2018 | 739 | 18.1 | 7.2  | 891  | 87.3  | 28.6 | 72.0 | 11.0 | 299.0 | 123.7 | 67.7 | 48.3  | 1.2  |
| Jadour Fouq | 21.03.1991 | 642 | n.a. | 7.5  | 800  | 85.8  | 24.3 | 62.5 | 19.5 | 255.0 | 62.0  | 31.7 | 101.0 | 0.4  |
| Jadour Fouq | 27.05.1991 | 617 | n.a. | 7.6  | 820  | 85.8  | 20.7 | 56.3 | 14.9 | 250.8 | 60.3  | 29.8 | 97.6  | 0.4  |
| Jadour Fouq | 20.08.1995 | 599 | n.a. | 7.6  | 801  | 90.4  | 21.4 | 32.2 | 13.7 | 256.8 | 61.8  | 23.0 | 99.2  | 0.3  |
| Jadour Fouq | 23.10.1995 | 564 | n.a. | 7.8  | 796  | 85.2  | 17.9 | 33.4 | 12.9 | 258.6 | 56.4  | 5.8  | 93.9  | 0.3  |

|             |            |     |      |      |      |       |      |      |      |       |       |      |       |      |
|-------------|------------|-----|------|------|------|-------|------|------|------|-------|-------|------|-------|------|
| Jadour Fouq | 19.12.1995 | 583 | n.a. | 7.5  | 828  | 84.8  | 17.9 | 33.8 | 13.3 | 274.5 | 56.8  | 5.8  | 95.9  | 0.3  |
| Jadour Fouq | 05.02.1996 | 609 | n.a. | 7.7  | 911  | 89.8  | 23.3 | 34.7 | 14.5 | 267.8 | 60.0  | 24.0 | 94.8  | 0.3  |
| Jadour Fouq | 31.05.2000 | 657 | n.a. | 7.8  | 941  | 91.4  | 29.6 | 36.3 | 13.3 | 252.5 | 67.8  | 33.1 | 132.5 | 0.3  |
| Jadour Fouq | 04.09.2003 | 668 | n.a. | 7.7  | 974  | 97.0  | 27.0 | 39.0 | 14.0 | 264.0 | 70.0  | 32.0 | 124.6 | 0.3  |
| Jadour Fouq | 18.05.2004 | 719 | n.a. | 7.8  | 920  | 101.2 | 32.0 | 38.0 | 14.9 | 289.1 | 78.1  | 37.4 | 128.4 | 0.3  |
| Jadour Fouq | 08.06.2005 | 656 | n.a. | 7.9  | 930  | 90.4  | 27.4 | 45.3 | 16.0 | 258.6 | 85.9  | 37.0 | 95.1  | 0.3  |
| Jadour Fouq | 29.11.2017 | 767 | 19.3 | 8.3  | 1021 | 87.8  | 26.7 | 82.1 | 17.5 | 271.5 | 131.3 | 84.6 | 63.9  | 1.1  |
| Jadour Fouq | 29.04.2018 | 738 | n.a. | 7.5  | 840  | 85.9  | 24.6 | 75.0 | 11.4 | 268.5 | 124.9 | 75.7 | 70.4  | 1.2  |
| Jadour Taht | 08.12.1985 | 690 | n.a. | 7.2  | 910  | 44.1  | 85.5 | 46.0 | 0.0  | 310.5 | 73.5  | 23.0 | 107.0 | 0.5  |
| Jadour Taht | 21.03.1991 | 705 | n.a. | 7.2  | 820  | 95.0  | 24.3 | 67.6 | 22.3 | 292.3 | 67.4  | 33.6 | 102.0 | 0.4  |
| Jadour Taht | 27.05.1991 | 645 | n.a. | 7.5  | 870  | 90.2  | 21.9 | 58.2 | 15.2 | 282.5 | 57.4  | 34.6 | 84.8  | 0.4  |
| Jadour Taht | 20.08.1995 | 652 | n.a. | 8.0  | 840  | 97.6  | 21.9 | 36.1 | 16.8 | 303.2 | 63.5  | 28.8 | 83.5  | 0.3  |
| Jadour Taht | 23.10.1995 | 629 | n.a. | 7.7  | 876  | 93.4  | 22.0 | 37.3 | 16.0 | 297.1 | 62.8  | 16.8 | 83.7  | 0.3  |
| Jadour Taht | 19.12.1995 | 596 | n.a. | 7.3  | 913  | 94.2  | 16.9 | 38.4 | 18.0 | 259.9 | 62.5  | 14.4 | 91.0  | 0.3  |
| Jadour Taht | 05.02.1996 | 682 | n.a. | 7.7  | 989  | 99.0  | 24.1 | 40.3 | 19.6 | 308.1 | 63.2  | 34.6 | 92.3  | 0.3  |
| Jadour Taht | 31.05.2000 | 743 | n.a. | 8.0  | 881  | 98.9  | 32.1 | 45.1 | 18.4 | 328.8 | 87.7  | 46.1 | 85.5  | 0.3  |
| Jadour Taht | 04.09.2003 | 624 | n.a. | 7.5  | 886  | 91.0  | 22.0 | 37.0 | 20.0 | 291.0 | 62.0  | 31.0 | 69.6  | 0.3  |
| Jadour Taht | 18.05.2004 | 661 | n.a. | 7.5  | 915  | 93.2  | 29.4 | 35.7 | 17.6 | 301.3 | 81.7  | 37.0 | 65.0  | 0.3  |
| Jadour Taht | 08.06.2005 | 685 | 20.1 | 8.5  | 1120 | 92.4  | 27.4 | 43.5 | 22.3 | 308.1 | 74.6  | 37.0 | 79.2  | 0.3  |
| Shoreia     | 26.03.1985 | 353 | n.a. | 7.2  | 450  | 61.1  | 11.6 | 9.2  | 3.9  | 206.2 | 21.3  | 18.2 | 21.0  | 0.1  |
| Shoreia     | 15.02.1989 | 330 | n.a. | 7.6  | 540  | 57.9  | 13.0 | 9.2  | 0.4  | 201.3 | 19.9  | 4.8  | 23.8  | 0.1  |
| Shoreia     | 04.09.1989 | 426 | n.a. | 7.6  | 560  | 64.5  | 22.4 | 16.1 | 3.1  | 229.4 | 34.8  | 24.0 | 31.0  | 0.2  |
| Shoreia     | 09.12.1989 | 416 | n.a. | 7.6  | 510  | 66.1  | 19.5 | 16.1 | 4.3  | 226.9 | 35.1  | 16.3 | 31.2  | 0.2  |
| Shoreia     | 03.03.1990 | 397 | n.a. | 7.7  | 470  | 67.3  | 14.0 | 13.8 | 2.7  | 222.0 | 30.2  | 17.8 | 29.5  | 0.2  |
| Shoreia     | 21.03.1991 | 364 | n.a. | 7.5  | 480  | 65.3  | 10.9 | 17.6 | 0.4  | 214.2 | 22.7  | 7.7  | 25.3  | 0.2  |
| Shoreia     | 27.05.1991 | 378 | n.a. | 7.9  | 475  | 63.7  | 14.6 | 16.8 | 0.0  | 216.0 | 25.9  | 12.5 | 28.1  | 0.2  |
| Shoreia     | 19.06.1994 | 359 | n.a. | 7.6  | 473  | 62.9  | 13.4 | 10.8 | 0.4  | 209.8 | 25.2  | 9.6  | 26.5  | 0.1  |
| Shoreia     | 20.08.1995 | 330 | n.a. | 7.9  | 465  | 58.1  | 13.4 | 10.8 | 0.4  | 196.4 | 21.7  | 1.9  | 27.5  | 0.1  |
| Shoreia     | 18.12.1995 | 333 | n.a. | 7.5  | 476  | 54.1  | 13.6 | 11.5 | 0.8  | 190.9 | 28.4  | 7.2  | 25.9  | 0.2  |
| Shoreia     | 05.02.1996 | 358 | n.a. | 7.9  | 494  | 62.7  | 12.8 | 10.6 | 0.4  | 215.9 | 23.4  | 9.6  | 22.8  | 0.1  |
| Shoreia     | 23.05.1999 | 380 | n.a. | 7.9  | 498  | 58.6  | 20.4 | 12.9 | 0.8  | 219.6 | 28.1  | 15.4 | 24.3  | 0.2  |
| Shoreia     | 31.05.2000 | 373 | n.a. | 7.9  | 470  | 63.0  | 16.9 | 12.0 | 0.4  | 216.6 | 23.8  | 13.0 | 27.1  | 0.1  |
| Shoreia     | 04.06.2000 | 378 | n.a. | 7.9  | 498  | 61.0  | 18.1 | 11.7 | 0.4  | 221.4 | 23.4  | 15.8 | 25.6  | 0.1  |
| Shoreia     | 04.09.2003 | 374 | n.a. | 7.7  | 530  | 70.0  | 10.0 | 12.0 | 1.0  | 221.0 | 24.0  | 12.0 | 23.6  | 0.1  |
| Shoreia     | 18.05.2004 | 412 | n.a. | 7.9  | 512  | 73.0  | 17.2 | 13.8 | 0.8  | 226.3 | 39.1  | 13.4 | 28.1  | 0.1  |
| Shoreia     | 08.06.2005 | 393 | 16.5 | 7.72 | 853  | 74.6  | 9.6  | 13.6 | 0.8  | 215.9 | 34.4  | 13.4 | 31.0  | 0.1  |
| Shoreia     | 15.02.2012 | 437 | n.a. | 8    | 420  | 75.6  | 15.0 | 20.9 | 1.1  | 222.7 | 45.8  | 22.0 | 34.5  | n.a. |
| Shoreia     | 29.11.2017 | 496 | 20.2 | 7.6  | 633  | 70.9  | 18.5 | 30.4 | 1.2  | 250.2 | 62.1  | 29.8 | 32.8  | 0.5  |
| Shoreia     | 29.04.2018 | 516 | 18.7 | 7.6  | 582  | 81.0  | 17.8 | 30.0 | 4.5  | 265.4 | 57.5  | 28.8 | 31.2  | n.a. |
| Um Attija   | 16.02.2012 | 573 | 23.3 | 7.6  | 788  | 91.4  | 19.7 | 36.1 | 1.6  | 272.7 | 73.2  | 40.6 | 38.0  | n.a. |
| Um Attija   | 29.11.2017 | 642 | 16.5 | 7.2  | 853  | 93.3  | 22.1 | 45.6 | 5.0  | 299.0 | 91.4  | 49.2 | 35.1  | 0.8  |
| Um Attija   | 29.04.2018 | 652 | 28.0 | 7.4  | 840  | 93.2  | 21.3 | 45.0 | 1.4  | 317.3 | 85.2  | 46.8 | 41.8  | 0.5  |

|                    |            |      |      |      |      |      |      |       |      |       |       |       |      |      |
|--------------------|------------|------|------|------|------|------|------|-------|------|-------|-------|-------|------|------|
| KAC                | 27.11.2017 | 715  | 18.7 | 8.5  | 980  | 52.1 | 34.3 | 104.7 | 6.8  | 286.8 | 113.0 | 109.1 | 6.7  | 1.0  |
| KAC                | 28.11.2017 | 757  | 21.1 | 8.5  | 959  | 51.0 | 32.4 | 125.6 | 16.8 | 244.1 | 186.2 | 94.3  | 4.2  | 2.2  |
| KAC                | 28.11.2017 | 702  | 20   | 7.6  | 638  | 49.2 | 35.1 | 101.2 | 7.2  | 268.5 | 124.1 | 109.2 | 6.3  | 1.3  |
| Water mains        | 30.11.2017 | 669  | 22.5 | 7.8  | 980  | 58.9 | 32.9 | 99.5  | 6.2  | 213.6 | 151.8 | 93.0  | 11.6 | 1.2  |
| Water mains        | 29.04.2018 | 692  | 20.1 | 8.5  | 1374 | 74.0 | 29.1 | 77.0  | 8.3  | 262.4 | 126.0 | 78.8  | 35.5 | 0.9  |
| As-Salt<br>WWTP    | 29.11.2017 | 1176 | 19.4 | 8.6  | 957  | 68.8 | 34.1 | 178.2 | 25.0 | 549.2 | 212.1 | 107.1 | 0.3  | 1.0  |
| Fuheis<br>WWTP     | 29.11.2017 | 1019 | 20.2 | 7.2  | 1040 | 74.9 | 25.1 | 189.2 | 28.5 | 347.8 | 221.5 | 130.3 | 0.5  | 1.2  |
| Yesidia            | 16.02.2012 | 494  | 20.2 | 8.3  | 1072 | 56.8 | 33.5 | 20.7  | 2.7  | 311.1 | 36.6  | 25.8  | 6.6  | n.a. |
| Yesidia            | 29.11.2017 | 518  | 21.4 | 7.6  | 661  | 73.1 | 22.3 | 26.6  | 5.7  | 277.6 | 57.5  | 25.4  | 29.5 | 0.5  |
| Yesidia            | 29.04.2018 | 534  | 17.9 | 7.6  | 638  | 83.6 | 20.0 | 27.0  | 1.1  | 289.8 | 56.0  | 26.8  | 29.2 | 0.5  |
| Zai In             | 29.11.2017 | 717  | 20.2 | 7.6  | 1041 | 52.5 | 36.3 | 117.0 | 7.1  | 238.0 | 157.6 | 100.7 | 6.6  | 1.6  |
| Zai Out            | 29.11.2017 | 726  | n.a. | n.a. | n.a. | 55.7 | 34.8 | 107.6 | 12.9 | 244.1 | 142.3 | 120.5 | 6.8  | 1.2  |
| Lake Tiberias      | 27.11.2017 | 834  | 19.1 | 8.3  | 1074 | 46.5 | 39.7 | 155.4 | 11.0 | 201.4 | 310.1 | 65.6  | 0.3  | 4.5  |
| Mukheiba<br>well 8 | 27.11.2017 | 568  | 45.1 | 7.4  | 717  | 59.6 | 19.8 | 49.7  | 6.6  | 353.9 | 65.6  | 12.0  | n.a. | 0.5  |
| Yarmouk            | 27.11.2017 | 669  | 16.6 | 7.7  | 664  | 44.8 | 34.0 | 85.8  | 7.8  | 277.6 | 108.0 | 100.2 | 9.6  | 0.7  |

Table S2 Electrical conductivity values from 1962 to 2018 at five selected springs and one well in the Wadi Shueib.

| <b>Name</b> | <b>date</b> | <b>value</b><br><b>μS/cm</b> |
|-------------|-------------|------------------------------|
| Baqqouria   | 05.02.1972  | 560                          |
| Baqqouria   | 04.04.1977  | 740                          |
| Baqqouria   | 21.04.1977  | 580                          |
| Baqqouria   | 20.01.1980  | 532                          |
| Baqqouria   | 01.10.1980  | 501                          |
| Baqqouria   | 27.12.1981  | 600                          |
| Baqqouria   | 04.10.1982  | 560                          |
| Baqqouria   | 19.03.1985  | 520                          |
| Baqqouria   | 08.12.1985  | 570                          |
| Baqqouria   | 14.09.1986  | 520                          |
| Baqqouria   | 15.12.1986  | 590                          |
| Baqqouria   | 15.12.1986  | 590                          |
| Baqqouria   | 24.05.1988  | 530                          |
| Baqqouria   | 15.02.1989  | 540                          |
| Baqqouria   | 22.05.1989  | 520                          |
| Baqqouria   | 04.09.1989  | 580                          |
| Baqqouria   | 09.12.1989  | 590                          |
| Baqqouria   | 03.03.1990  | 540                          |
| Baqqouria   | 12.07.1990  | 590                          |
| Baqqouria   | 21.03.1991  | 590                          |
| Baqqouria   | 27.05.1991  | 590                          |
| Baqqouria   | 19.06.1994  | 588                          |
| Baqqouria   | 20.08.1995  | 607                          |
| Baqqouria   | 23.10.1995  | 602                          |
| Baqqouria   | 23.05.1999  | 653                          |
| Baqqouria   | 31.05.2000  | 683                          |
| Baqqouria   | 04.06.2000  | 645                          |
| Baqqouria   | 04.09.2003  | 608                          |
| Baqqouria   | 18.05.2004  | 670                          |
| Baqqouria   | 08.06.2005  | 637                          |
| Baqqouria   | 15.02.2012  | 715                          |
| Baqqouria   | 29.11.2017  | 808                          |
| Baqqouria   | 29.04.2018  | 784                          |
| Farkha      | 29.03.1971  | 850                          |
| Farkha      | 13.03.1972  | 870                          |
| Farkha      | 01.10.1980  | 748                          |
| Farkha      | 27.07.1981  | 795                          |
| Farkha      | 05.10.1982  | 850                          |
| Farkha      | 27.01.1986  | 820                          |

|        |            |      |
|--------|------------|------|
| Farkha | 30.06.1987 | 910  |
| Farkha | 06.09.1988 | 790  |
| Farkha | 19.06.1989 | 840  |
| Farkha | 19.06.1989 | 840  |
| Farkha | 08.07.1991 | 770  |
| Farkha | 22.06.1994 | 780  |
| Farkha | 01.05.1995 | 823  |
| Farkha | 28.07.1997 | 718  |
| Farkha | 30.08.2000 | 693  |
| Farkha | 30.08.2000 | 693  |
| Farkha | 18.05.2004 | 860  |
| Farkha | 18.05.2004 | 860  |
| Farkha | 19.02.2012 | 895  |
| Farkha | 29.11.2017 | 1004 |
| Farkha | 29.04.2018 | 1002 |
| Hazzir | 06.01.1972 | 900  |
| Hazzir | 15.08.1980 | 690  |
| Hazzir | 04.03.1981 | 845  |
| Hazzir | 26.03.1985 | 760  |
| Hazzir | 08.12.1985 | 440  |
| Hazzir | 28.04.1986 | 430  |
| Hazzir | 14.09.1986 | 890  |
| Hazzir | 15.12.1986 | 840  |
| Hazzir | 15.12.1986 | 840  |
| Hazzir | 15.02.1989 | 800  |
| Hazzir | 23.05.1989 | 760  |
| Hazzir | 04.09.1989 | 812  |
| Hazzir | 09.12.1989 | 820  |
| Hazzir | 03.03.1990 | 770  |
| Hazzir | 21.03.1991 | 820  |
| Hazzir | 27.05.1991 | 760  |
| Hazzir | 19.06.1994 | 772  |
| Hazzir | 20.08.1995 | 824  |
| Hazzir | 23.10.1995 | 811  |
| Hazzir | 05.02.1996 | 801  |
| Hazzir | 23.05.1999 | 870  |
| Hazzir | 31.05.2000 | 876  |
| Hazzir | 31.05.2000 | 876  |
| Hazzir | 04.06.2000 | 813  |
| Hazzir | 04.06.2000 | 813  |
| Hazzir | 04.09.2003 | 831  |
| Hazzir | 04.09.2003 | 831  |
| Hazzir | 18.05.2004 | 861  |
| Hazzir | 18.05.2004 | 861  |

|              |            |      |
|--------------|------------|------|
| Hazzir       | 08.06.2005 | 845  |
| Hazzir       | 08.06.2005 | 845  |
| Hazzir       | 15.02.2012 | 891  |
| Hazzir       | 30.11.2017 | 1040 |
| Hazzir       | 29.04.2018 | 1014 |
| Jadour Fouqa | 22.04.1980 | 684  |
| Jadour Fouqa | 04.03.1981 | 910  |
| Jadour Fouqa | 31.10.1983 | 810  |
| Jadour Fouqa | 18.04.1984 | 820  |
| Jadour Fouqa | 28.10.1984 | 810  |
| Jadour Fouqa | 26.03.1985 | 800  |
| Jadour Fouqa | 09.12.1985 | 810  |
| Jadour Fouqa | 28.04.1986 | 760  |
| Jadour Fouqa | 14.09.1986 | 810  |
| Jadour Fouqa | 14.09.1986 | 810  |
| Jadour Fouqa | 15.12.1986 | 890  |
| Jadour Fouqa | 13.05.1987 | 830  |
| Jadour Fouqa | 29.08.1987 | 820  |
| Jadour Fouqa | 04.11.1987 | 810  |
| Jadour Fouqa | 15.03.1988 | 810  |
| Jadour Fouqa | 06.08.1989 | 830  |
| Jadour Fouqa | 21.03.1991 | 840  |
| Jadour Fouqa | 27.05.1991 | 800  |
| Jadour Fouqa | 20.08.1995 | 820  |
| Jadour Fouqa | 23.10.1995 | 801  |
| Jadour Fouqa | 19.12.1995 | 796  |
| Jadour Fouqa | 05.02.1996 | 828  |
| Jadour Fouqa | 31.05.2000 | 911  |
| Jadour Fouqa | 31.05.2000 | 911  |
| Jadour Fouqa | 04.09.2003 | 941  |
| Jadour Fouqa | 18.05.2004 | 974  |
| Jadour Fouqa | 08.06.2005 | 920  |
| Jadour Fouqa | 29.11.2017 | 1074 |
| Jadour Fouqa | 29.04.2018 | 1021 |
| Jadour Tahta | 22.04.1980 | 795  |
| Jadour Tahta | 04.03.1981 | 990  |
| Jadour Tahta | 31.10.1983 | 825  |
| Jadour Tahta | 26.03.1985 | 890  |
| Jadour Tahta | 08.12.1985 | 930  |
| Jadour Tahta | 28.04.1986 | 730  |
| Jadour Tahta | 14.09.1986 | 990  |
| Jadour Tahta | 15.12.1986 | 1000 |
| Jadour Tahta | 13.05.1987 | 890  |
| Jadour Tahta | 29.08.1987 | 900  |

|              |            |     |
|--------------|------------|-----|
| Jadour Tahta | 04.11.1987 | 960 |
| Jadour Tahta | 15.03.1988 | 820 |
| Jadour Tahta | 06.08.1989 | 890 |
| Jadour Tahta | 10.09.1990 | 870 |
| Jadour Tahta | 10.09.1990 | 870 |
| Jadour Tahta | 21.03.1991 | 910 |
| Jadour Tahta | 27.05.1991 | 820 |
| Jadour Tahta | 20.08.1995 | 870 |
| Jadour Tahta | 23.10.1995 | 840 |
| Jadour Tahta | 19.12.1995 | 876 |
| Jadour Tahta | 05.02.1996 | 913 |
| Jadour Tahta | 31.05.2000 | 989 |
| Jadour Tahta | 31.05.2000 | 989 |
| Jadour Tahta | 04.09.2003 | 881 |
| Jadour Tahta | 04.09.2003 | 881 |
| Jadour Tahta | 18.05.2004 | 886 |
| Jadour Tahta | 18.05.2004 | 886 |
| Jadour Tahta | 08.06.2005 | 915 |
| Jadour Tahta | 08.06.2005 | 915 |
| Shoreia      | 03.06.1973 | 460 |
| Shoreia      | 22.04.1980 | 418 |
| Shoreia      | 26.03.1985 | 420 |
| Shoreia      | 08.12.1985 | 450 |
| Shoreia      | 28.04.1986 | 430 |
| Shoreia      | 14.09.1986 | 510 |
| Shoreia      | 15.12.1986 | 540 |
| Shoreia      | 15.12.1986 | 540 |
| Shoreia      | 15.02.1989 | 450 |
| Shoreia      | 22.05.1989 | 510 |
| Shoreia      | 04.09.1989 | 540 |
| Shoreia      | 09.12.1989 | 560 |
| Shoreia      | 03.03.1990 | 510 |
| Shoreia      | 21.03.1991 | 470 |
| Shoreia      | 27.05.1991 | 480 |
| Shoreia      | 19.06.1994 | 475 |
| Shoreia      | 20.08.1995 | 473 |
| Shoreia      | 23.10.1995 | 434 |
| Shoreia      | 18.12.1995 | 465 |
| Shoreia      | 05.02.1996 | 476 |
| Shoreia      | 23.05.1999 | 494 |
| Shoreia      | 31.05.2000 | 498 |
| Shoreia      | 31.05.2000 | 498 |
| Shoreia      | 04.06.2000 | 470 |
| Shoreia      | 04.06.2000 | 470 |



|           |            |     |
|-----------|------------|-----|
| Shoreia   | 04.09.2003 | 498 |
| Shoreia   | 18.05.2004 | 530 |
| Shoreia   | 08.06.2005 | 512 |
| Shoreia   | 15.02.2012 | 582 |
| Shoreia   | 29.11.2017 | 638 |
| Shoreia   | 29.04.2018 | 633 |
| Um Attija | 09.04.1978 | 590 |
| Um Attija | 09.04.1978 | 378 |
| Um Attija | 10.04.1978 | 605 |
| Um Attija | 11.04.1978 | 585 |
| Um Attija | 10.09.1983 | 570 |
| Um Attija | 14.09.1984 | 560 |
| Um Attija | 15.09.1984 | 560 |
| Um Attija | 29.01.1985 | 580 |
| Um Attija | 27.04.1985 | 570 |
| Um Attija | 17.08.1985 | 560 |
| Um Attija | 19.09.1985 | 560 |
| Um Attija | 03.05.1986 | 550 |
| Um Attija | 31.05.1986 | 540 |
| Um Attija | 07.09.1986 | 600 |
| Um Attija | 07.12.1986 | 580 |
| Um Attija | 16.06.1987 | 550 |
| Um Attija | 10.08.1987 | 550 |
| Um Attija | 18.01.1988 | 560 |
| Um Attija | 24.05.1988 | 530 |
| Um Attija | 09.10.1988 | 560 |
| Um Attija | 22.05.1989 | 550 |
| Um Attija | 09.12.1989 | 570 |
| Um Attija | 03.03.1990 | 580 |
| Um Attija | 03.03.1990 | 580 |
| Um Attija | 25.07.1994 | 590 |
| Um Attija | 29.06.1995 | 602 |
| Um Attija | 14.08.1995 | 596 |
| Um Attija | 29.07.1996 | 780 |
| Um Attija | 21.12.1997 | 604 |
| Um Attija | 08.06.1999 | 608 |
| Um Attija | 27.10.1999 | 604 |
| Um Attija | 16.02.2012 | 788 |
| Um Attija | 29.11.2017 | 853 |
| Um Attija | 29.04.2018 | 840 |

---



|            |        |        |       |        |       |            |        |        |  |  |  |  |  |  |  |  |
|------------|--------|--------|-------|--------|-------|------------|--------|--------|--|--|--|--|--|--|--|--|
| April 2018 | 125.96 | 133.80 | 85.16 | 175.40 | 56.01 | 122.<br>82 |        |        |  |  |  |  |  |  |  |  |
|            |        |        |       |        |       |            | 192.82 | 148.57 |  |  |  |  |  |  |  |  |
|            |        |        |       |        |       |            | 203.03 | 135.53 |  |  |  |  |  |  |  |  |
